# Supplementary material for: Short daytime napping reduces the risk of cognitive decline in community-dwelling older adults: a 5-year longitudinal study
Source: PubMed Central journal article supplement (PMC8401113; doi:10.1186/s12877-021-02418-0), 2021-08-28
Supplement: 12877_2021_2418_MOESM3_ESM.pdf [file 12877_2021_2418_MOESM3_ESM.pdf]

## Additional Information 1

### The interviewer's guide

#### \*Family environment

Do you live alone or with family? Choices: (1) alone (2) with family

#### \*Job

Do you currently have a job? Choices: (1) yes (2) no

#### \*Disease history (based on diagnosis or prescription of medication by a doctor)

Do you have hypertension? Choices: (1) yes (2) no

Do you have a history of stroke? Choices: (1) yes (2) no

Do you have diabetes? Choices: (1) yes (2) no

#### \*Alcohol habits

Do you drink alcohol? Choices: (1) never (2) no (ex-drinker) (3) yes

If yes, how often do you drink? Choices: (1) <1 (2) 1, 2 or 3 (3) 4, 4 or 5, 5, 6 or 7 (days/week)

If yes, how much do you drink a day?

Choices: (1) <1 (2) 1-1.9 (3) 2-2.9 (4) 3-3.9 (5) 4-4.9 (6) 5-5.9 (7) 6-6.9 (8) 7-7.9 (9) 8-8.9 (10) 9-9.9 (11) 10 or more (*gou*/days; 1 *gou* is equivalent to 180 mL of Japanese *sake*)

#### \*Smoking habits

Do you smoke? Choices: (1) never (2) no (ex-smoker) (3) yes

#### \*Sleep habits

What time do you go to sleep? Typical time: \_\_\_\_\_:\_\_\_\_\_ (PM or AM)

How long do you sleep? (typical sleep duration)

Choices: (1) <3 (2) 3-3.9 (3) 4-4.9 (4) 5-5.9 (5) 6-6.9 (6) 7-7.9 (7) 8-8.9 (8) 9-9.9 (9) 10 or more (hours)

How is your sleep quality? Choices: (1) good (2) bad (sleep disturbance)

Do you take any sleep pills? Choices: (1) yes (2) no

Do you take a daytime nap? If so, for how long? Choices: (1) no (2) <30 (3) 30-59 (4) ≥60 (minutes)

\*Cognitive function is assessed using the revised Hasegawa's dementia scale (HDS-R) (Imai & Hasegawa, 1994).

**Appendix 1. Hasegawa's Dementia Scale - Revised (HDS-R)**

|             |                                                                                                                                                                                                                                                                                                         |                              |                  |                   |
|-------------|---------------------------------------------------------------------------------------------------------------------------------------------------------------------------------------------------------------------------------------------------------------------------------------------------------|------------------------------|------------------|-------------------|
| 1.          | How old are you? (+/- 2 yrs.)                                                                                                                                                                                                                                                                           |                              | 0                | 1                 |
| 2.          | Year, month, date, day?<br>1 point each.                                                                                                                                                                                                                                                                | Year<br>Month<br>Date<br>Day | 0<br>0<br>0<br>0 | 1<br>1<br>1<br>1  |
| 3.          | What is this place?<br>Correct answer in 5 sec.:2 points<br>Correct choice between "hospital? office?"                                                                                                                                                                                                  |                              | 0<br>0           | 2<br>1            |
| 4.          | Repeating 3 words. 1 point each. (To use only one version per test.)<br>Version A:"a)cherry blossom b)cat c)tram"<br>Version B:"a)plum blossom b)dog c)car"                                                                                                                                             | a)<br>b)<br>c)               | 0<br>0<br>0      | 1<br>1<br>1       |
| 5.          | 100-7=?If correct, 1 point.<br>If not:skip to item #6.<br>-7 again=?If correct, 1 point.                                                                                                                                                                                                                | 93<br>86                     | 0<br>0           | 1<br>1            |
| 6.          | Repeat 6-8-2 backwards.<br>If not:skip to item #7.<br>Repeat 3-5-2-9 backwards.                                                                                                                                                                                                                         |                              | 0<br>0           | 1<br>1            |
| 7.          | Recall 3 words. For each words<br>2 points for spontaneous recall.<br>1 points for correct recall after category cue                                                                                                                                                                                    | a)<br>b)<br>c)               | 0<br>0<br>0      | 1 2<br>1 2<br>1 2 |
| 8.          | Show five unrelated common object, then take them back and ask for recall.<br>1 point each.                                                                                                                                                                                                             |                              | 0<br>3           | 1 2<br>4 5        |
| 9.          | Name all vegetables that come to mind.<br>No time limit. May remind once.<br>Terminate when there is no further answer after a 10 <sub>7</sub> sec. interval. For each vegetable name after the 5th one:1 point.<br>1._____ 2._____ 3._____ 4._____ 5._____<br>6._____ 7._____ 8._____ 9._____ 10._____ |                              | 0<br>3           | 1 2<br>4 5        |
| Total score |                                                                                                                                                                                                                                                                                                         |                              | /30              |                   |
